# Supplementary material
Source: PubMed Central journal article supplement (PMC6643227)
Supplement: AEM.00523-19-s0001.pdf [file AEM.00523-19-s0001.pdf]

Figure S1. Mineral composition of the B3 sediment layers. The major mineral component of B3-1 (sediment depth 30 cm) and B3-2 (sediment depth 40 cm) was estimated by X-ray diffraction measurement.

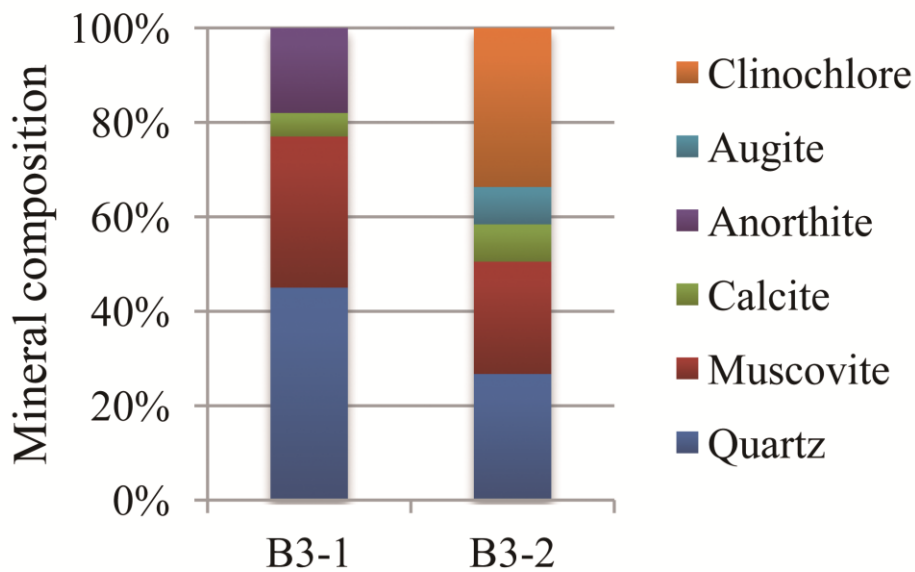

Figure S2. 16S rRNA operational taxonomic units (OTUs) in B3. Taxonomic classification of the representative reads in the OTUs (>97% similarity) was performed through comparing with sequences of SILVA database.

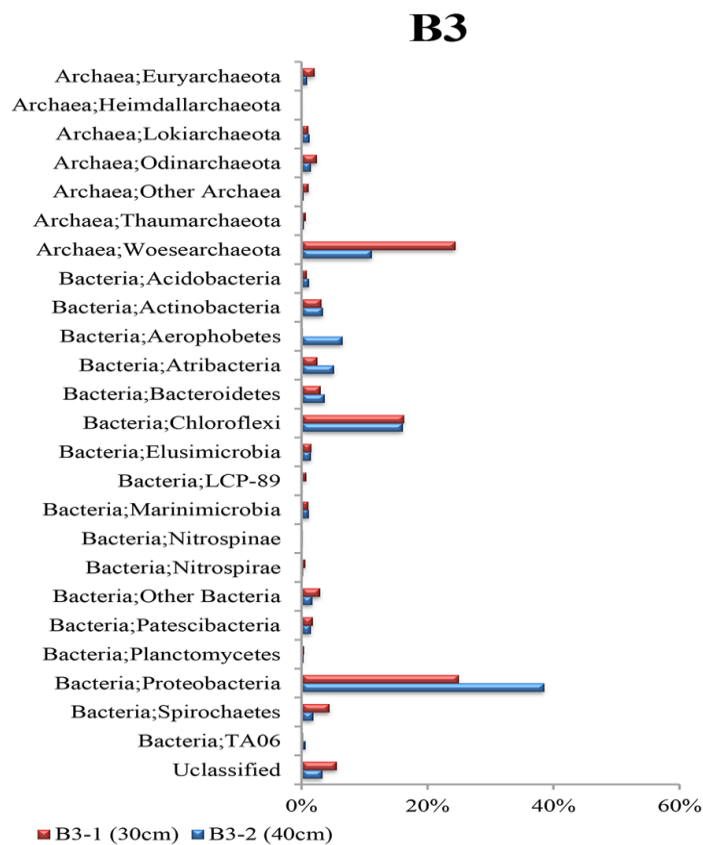

Figure S3. Genome binning based on coverage and tetranucleotide frequencies of the scaffolds of the B3 metagenomes. (A) metagenome-assembled genomes (MAGs) with different coverage levels in B3-1 and B3-2 were labeled with numbers. The coverage was determined by the recruitment of reads from B3-1 and B3-2 layers to the assembled scaffolds. Colors indicate a rough classification of different groups. (B) Archaeal scaffolds in the 2-D coverage plotting were pinpointed and were further separated based on correspondence analysis (CA) of tetranucleotide frequencies; (C) Bacterial scaffolds were located in the 2-D coverage plotting and further separated based on CA of tetranucleotide frequencies.

**A**

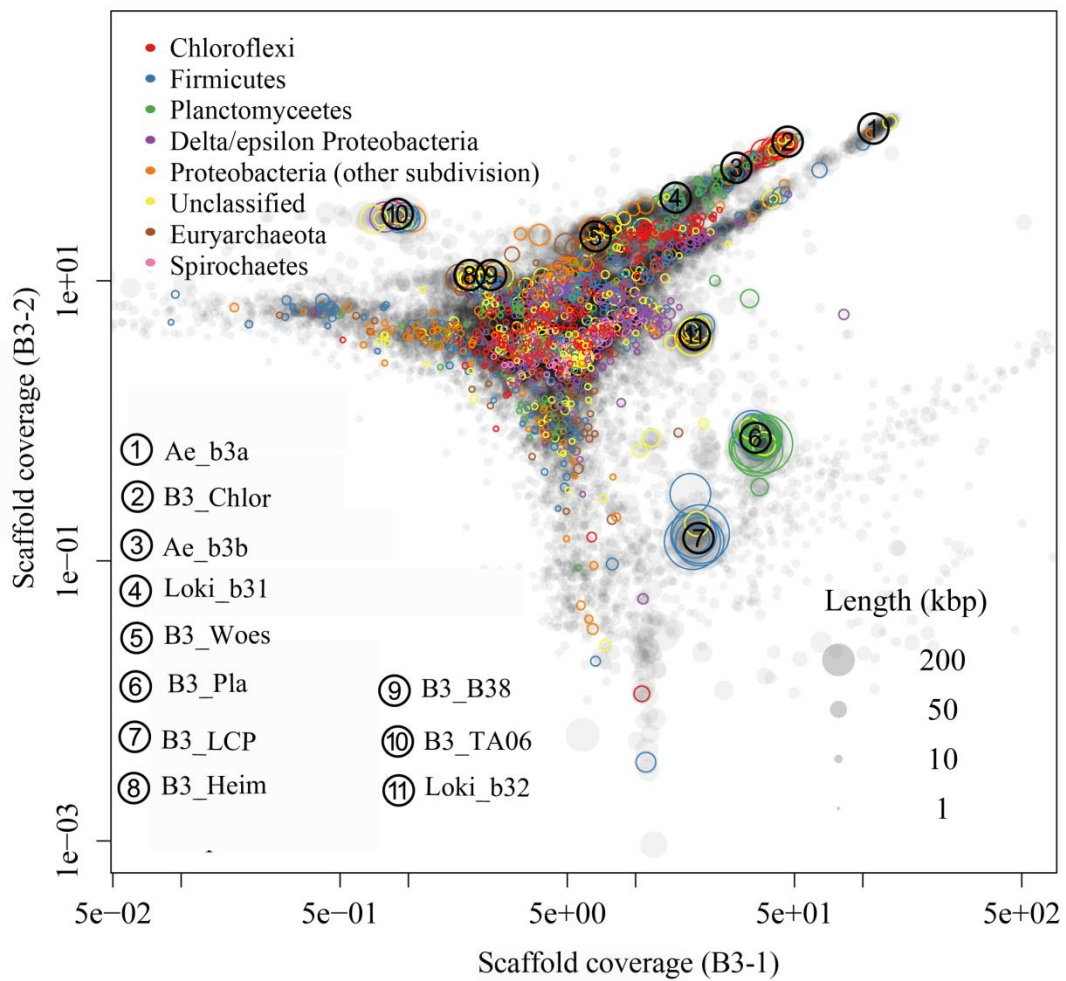

**B**

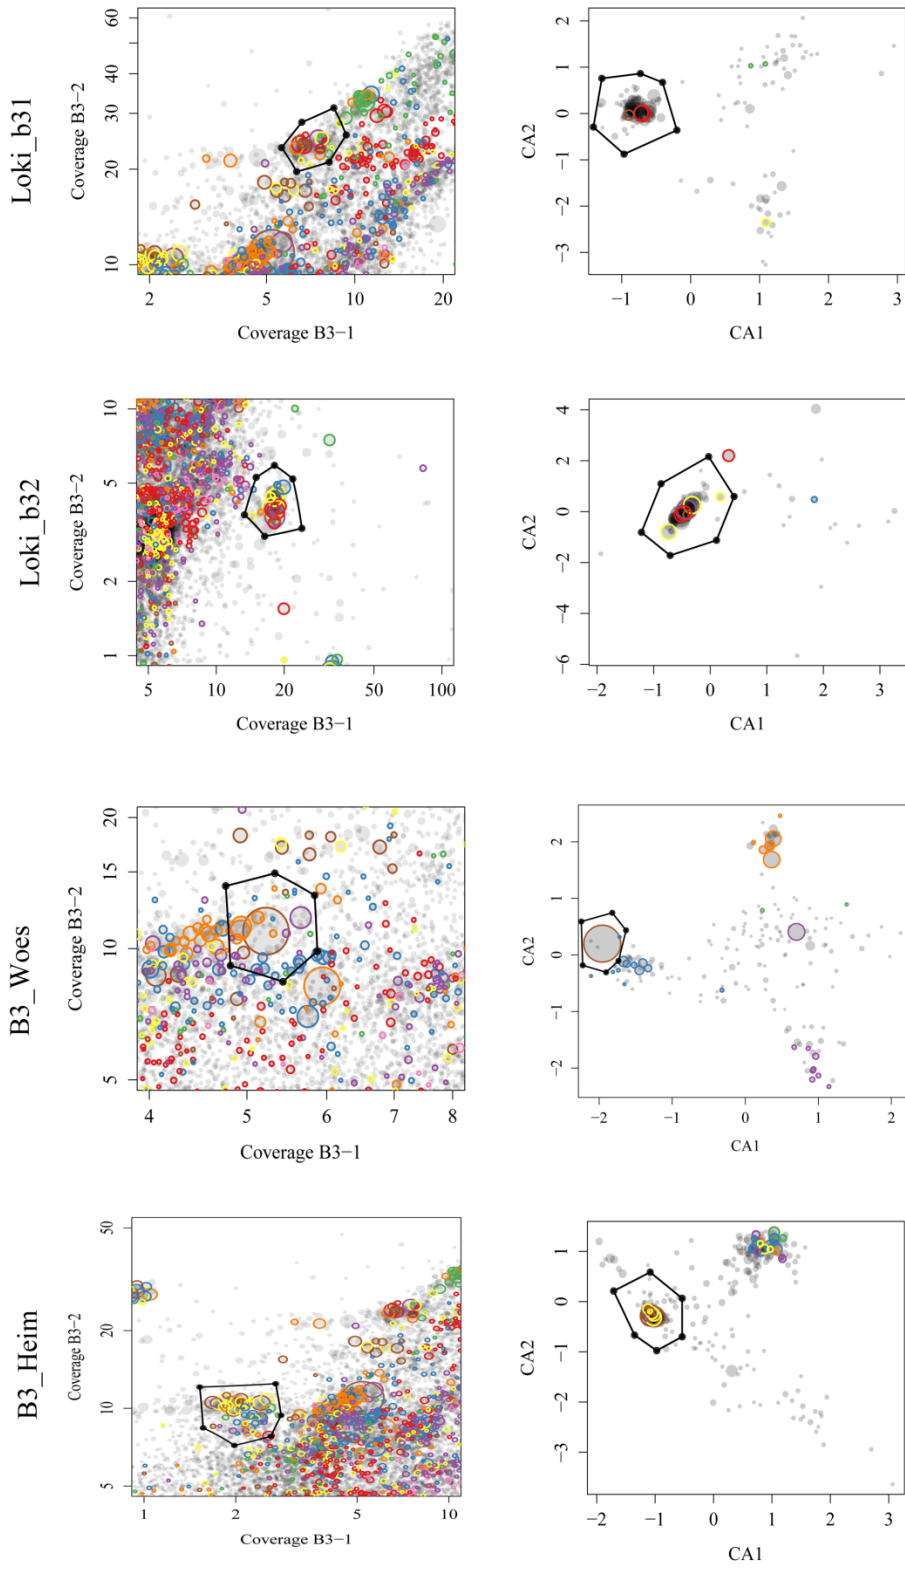

C

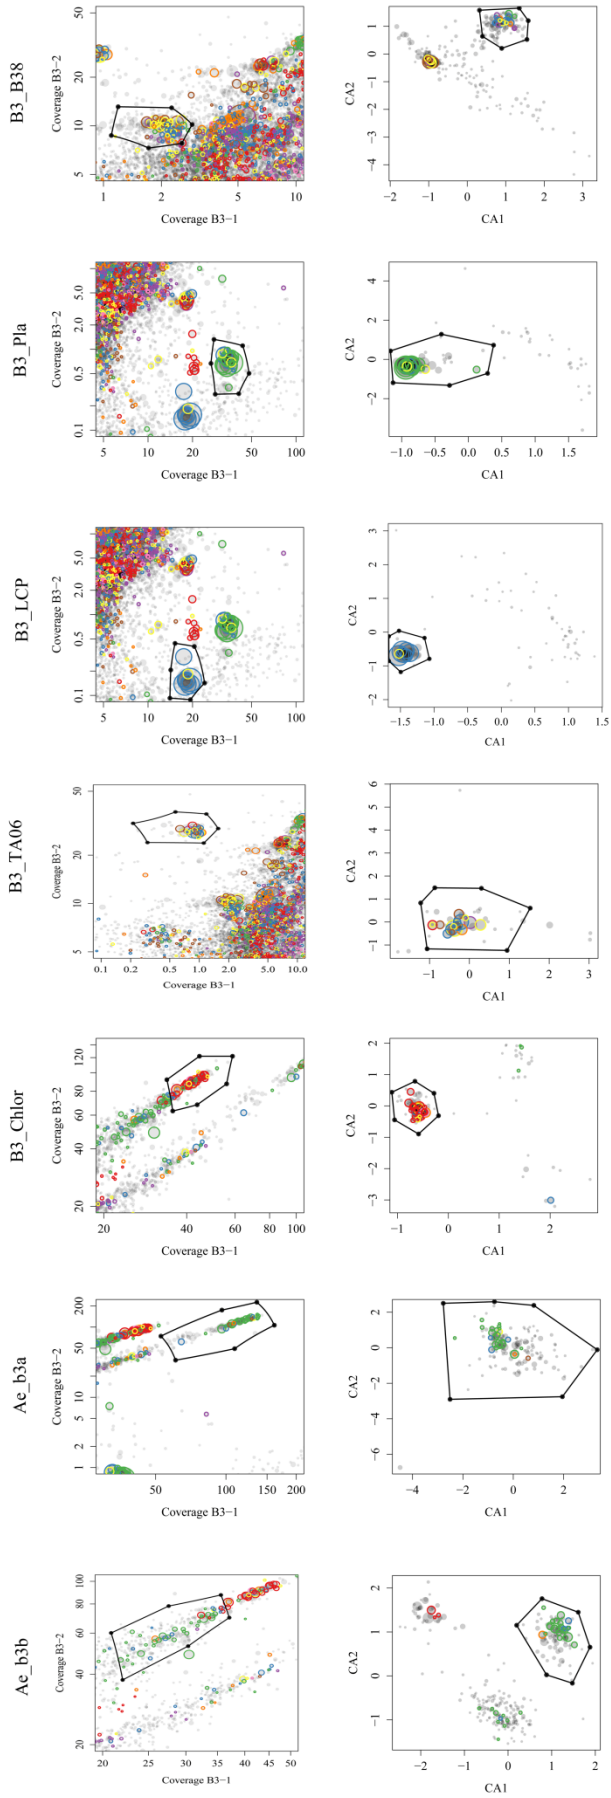

Figure S4. Relative abundance of metagenomic reads for each MAG in samples.

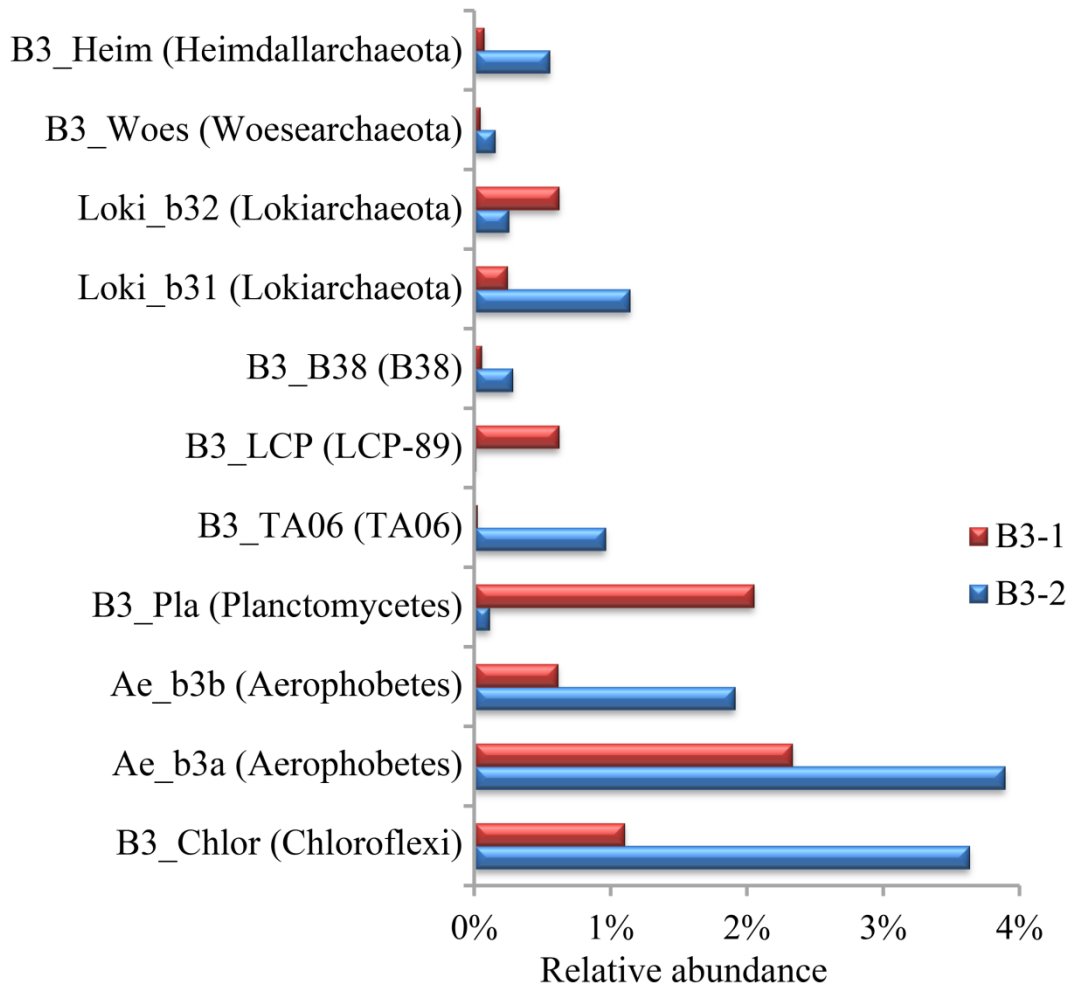

Figure S5. Phylogenetic analyses of 16S rRNA genes from bacterial MAGs (A) B38, (B) TA06 and (C) LCP-89 with relatives from different habitats. The tree was generated by raxmlGUI using maximum-likelihood method with GTRGAMMA model and 1000 replicates. Species detected in B3 are highlighted in red.

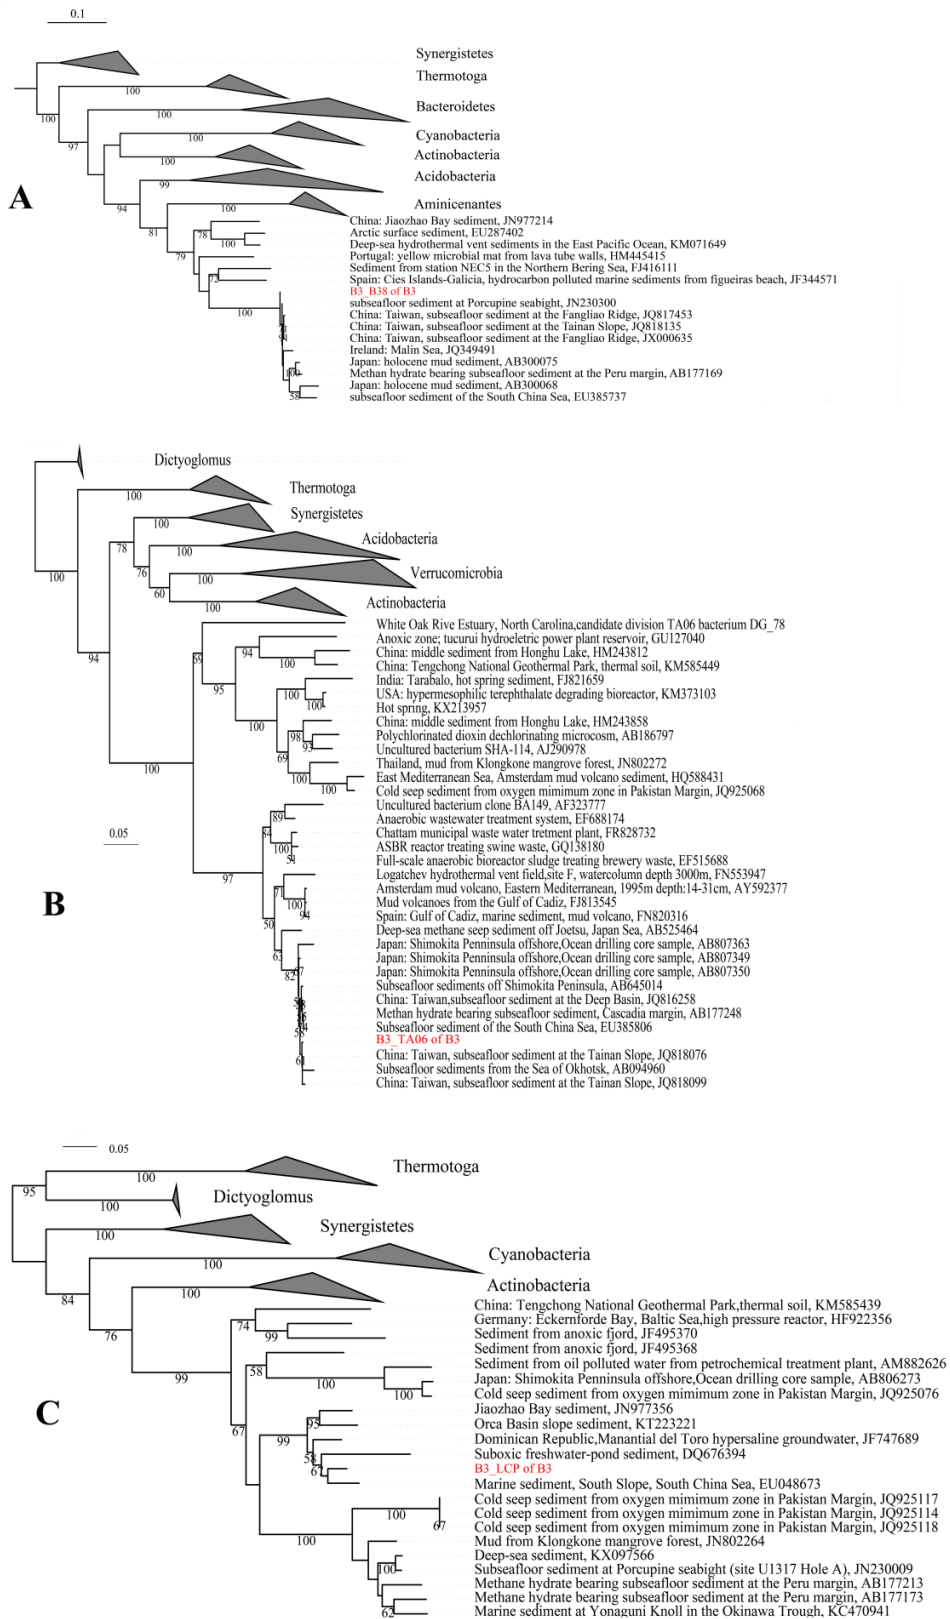

Figure S6. Phylogenetic analyses of 16S rRNA genes from archaeal MAGs (A) Lokiarchaeota and (B) Heimdallarchaeota with relatives from different habitats. The tree was generated by raxmlGUI using maximum-likelihood method with GTRGAMMA model and 1000 replicates. Species detected in B3 are highlighted in red.

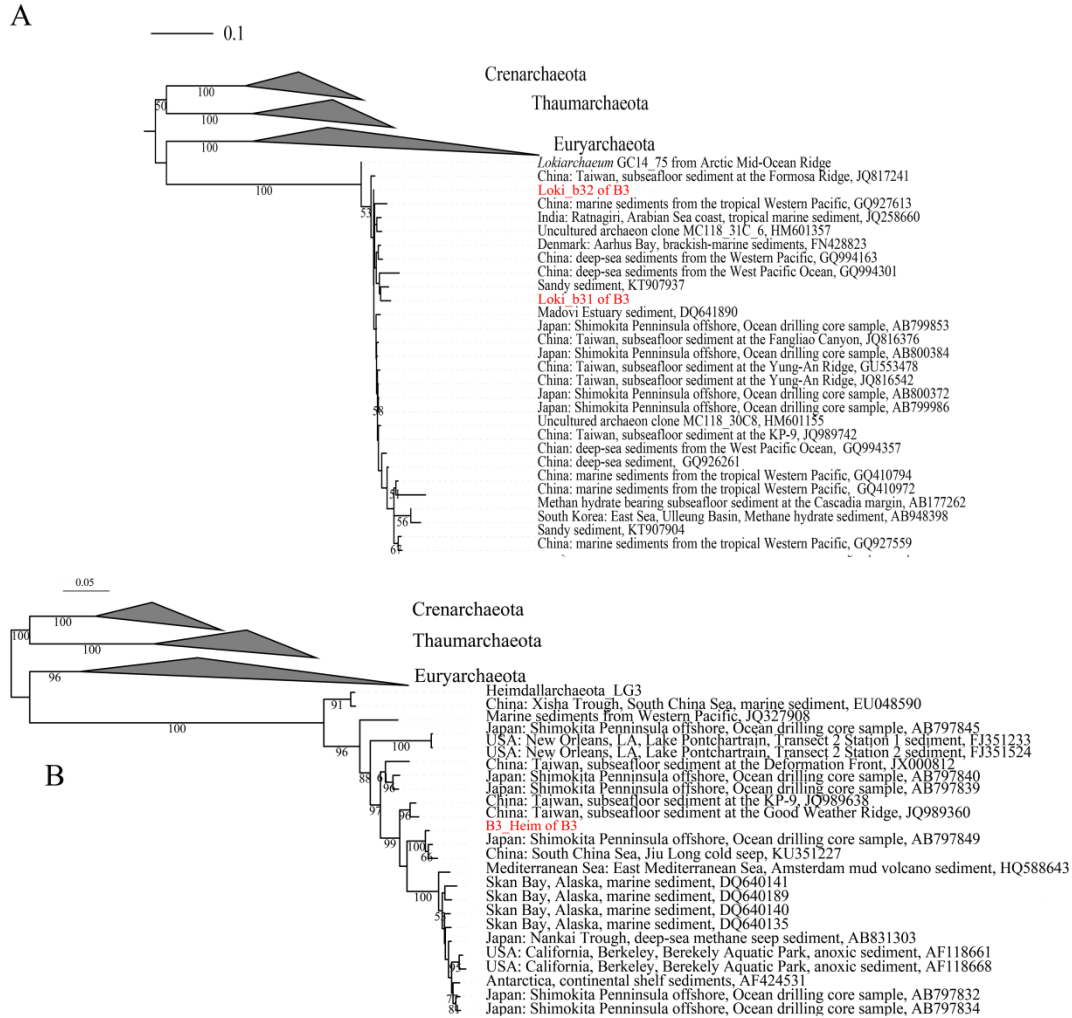

Figure S7. SECIS element (SECIS: selenocysteine insertion sequence) of MAGs (A) B3\_B38 (B38) and (B) B3\_LCP (LCP-89).

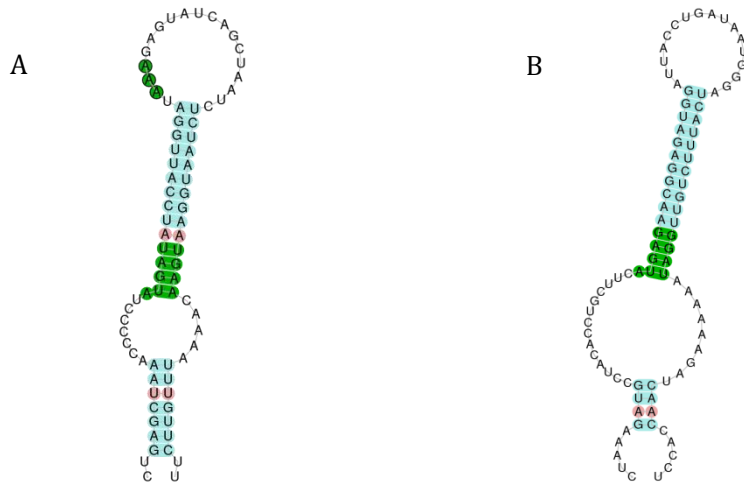

Figure S8. Phylogenetic analyses of B3\_LCP DsrAB proteins in relation to other publicly available sequences generated using RAxML as part of the ARB software package. The closest BLAST in NCBI matches to Senitrabacteria were included in this phylogeny.

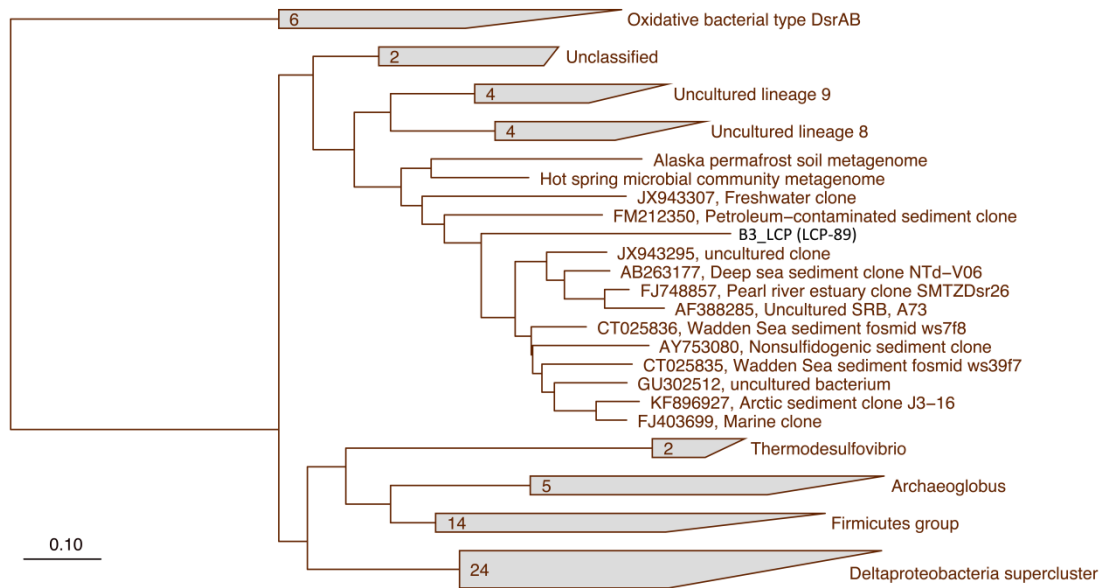



Figure S9. Peptidases predicted using MEROPS database.  
 The family types of the peptidases are referred to [http://merops.sanger.ac.uk/cgi-bin/family\\_index?type=P](http://merops.sanger.ac.uk/cgi-bin/family_index?type=P).

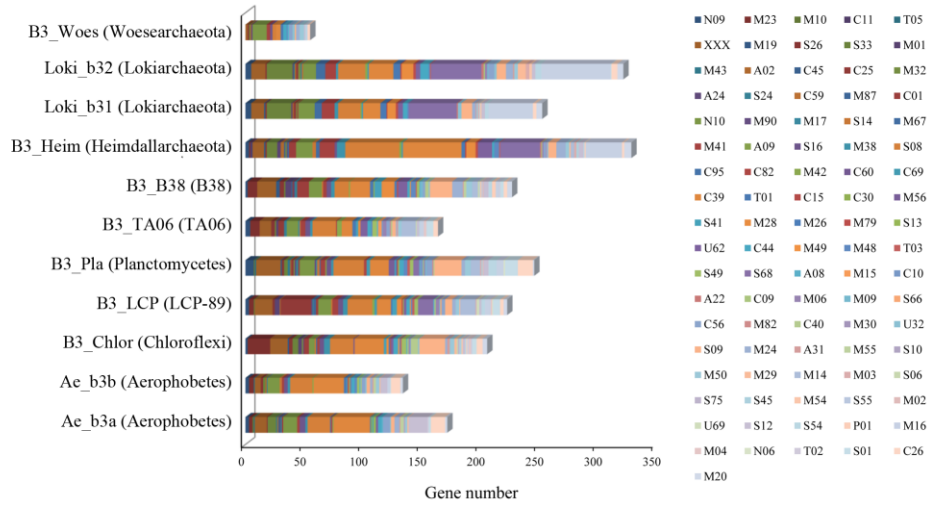

Figure S10. Schematic metabolisms of Lokiarchaeota (A) and Aerophobetes (B). Acc: acetyl-CoA carboxylase carboxyl transferase;  $FD_{ox}$  and  $FD_{red}$ : oxidized and reduced ferredoxin, respectively; Rnf complex: electron transport complex. Mrp: monovalent cation/proton antiporter; nirB: nitrite reductase (NADH) large subunit. The pathways with a red arrow are transcriptional active.

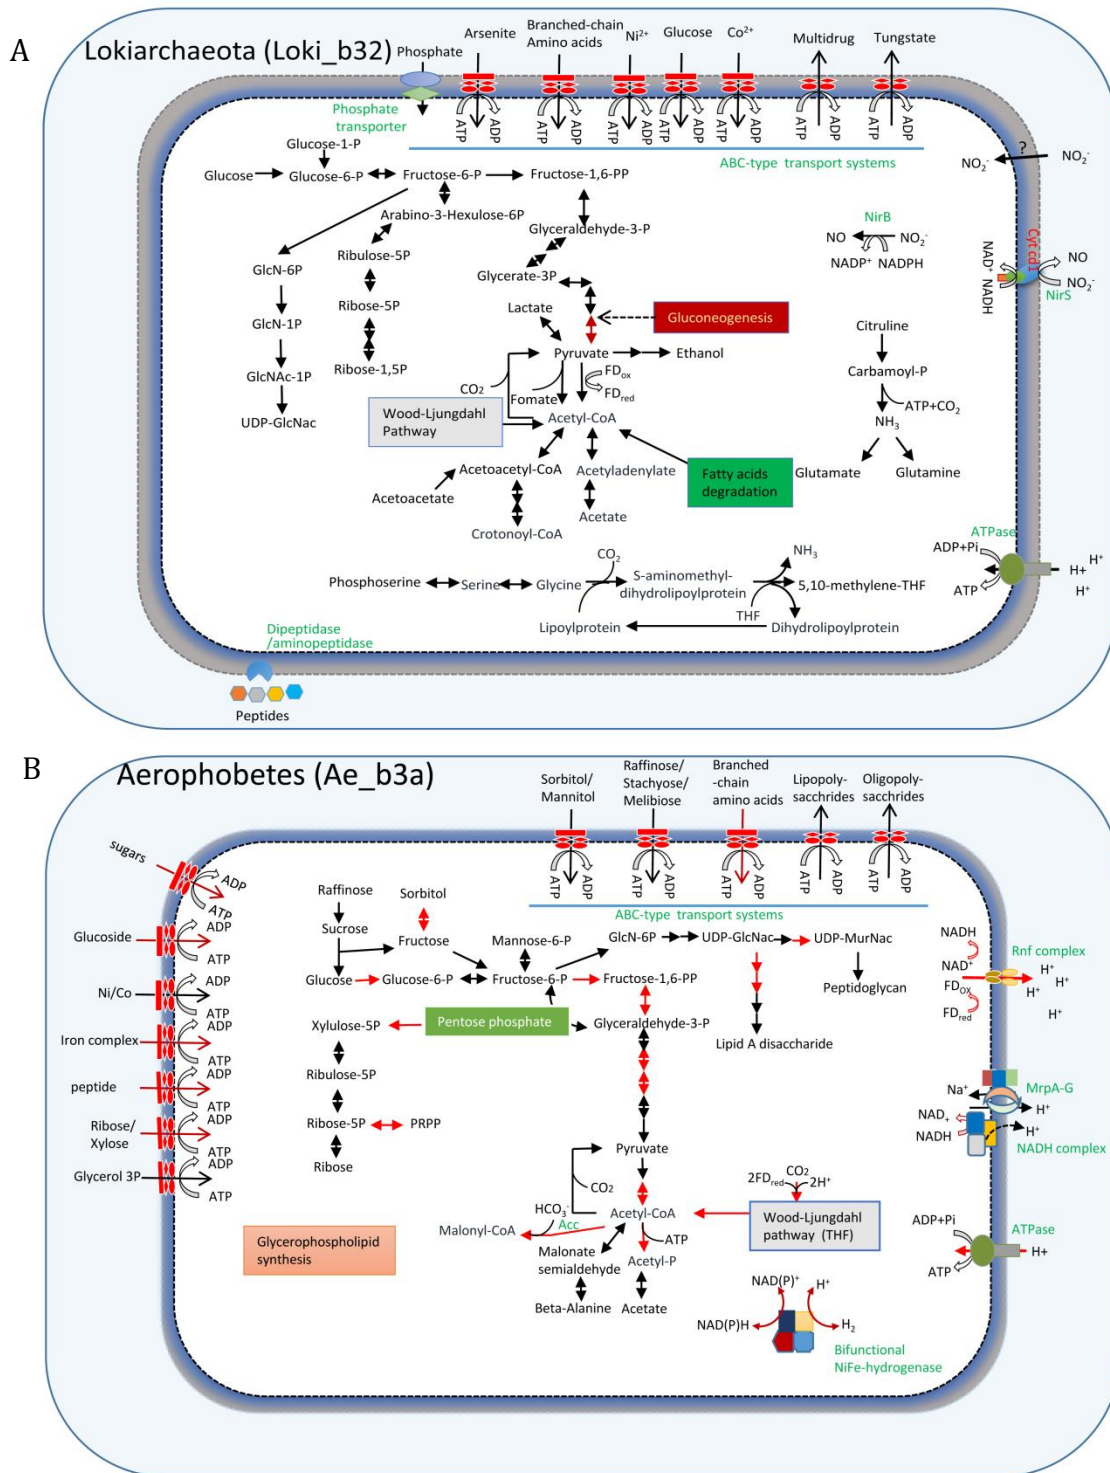

Figure S11. Phylogenetic tree based on (A) Acetyl-CoA decarboxylase/synthase complex subunit alpha/beta (AcsAB) and (B) Carbon monoxide CO dehydrogenase (Cdh) in Wood-Ljungdahl pathway. Using raxmlGUI, 1000 replicates and PROGTRGAMMA model, Bootstrap values >50% are shown. The AcsAB and Cdh genes from B3 are shaded in yellow.

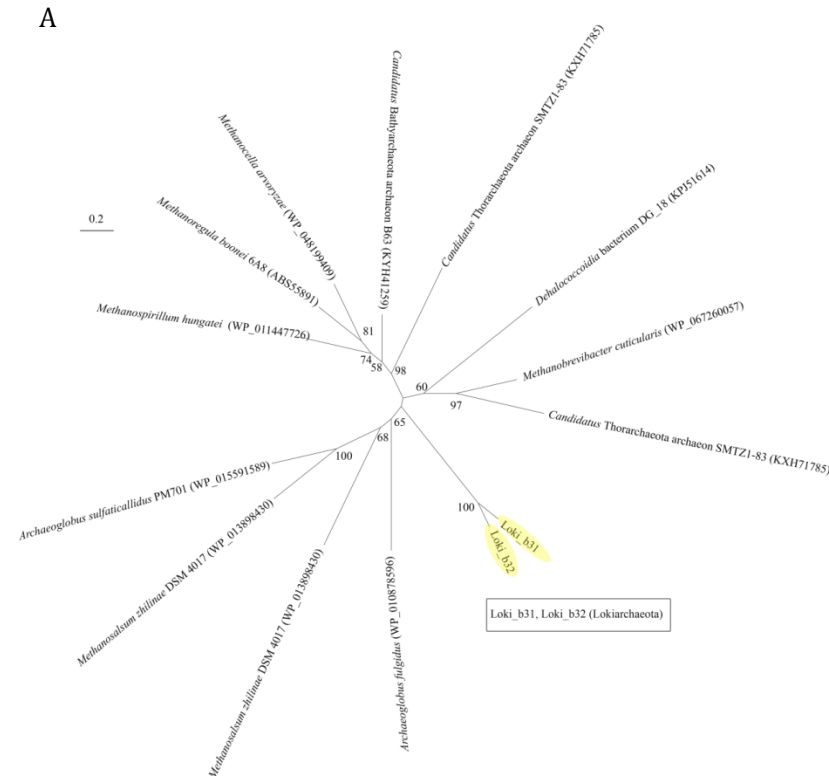

B

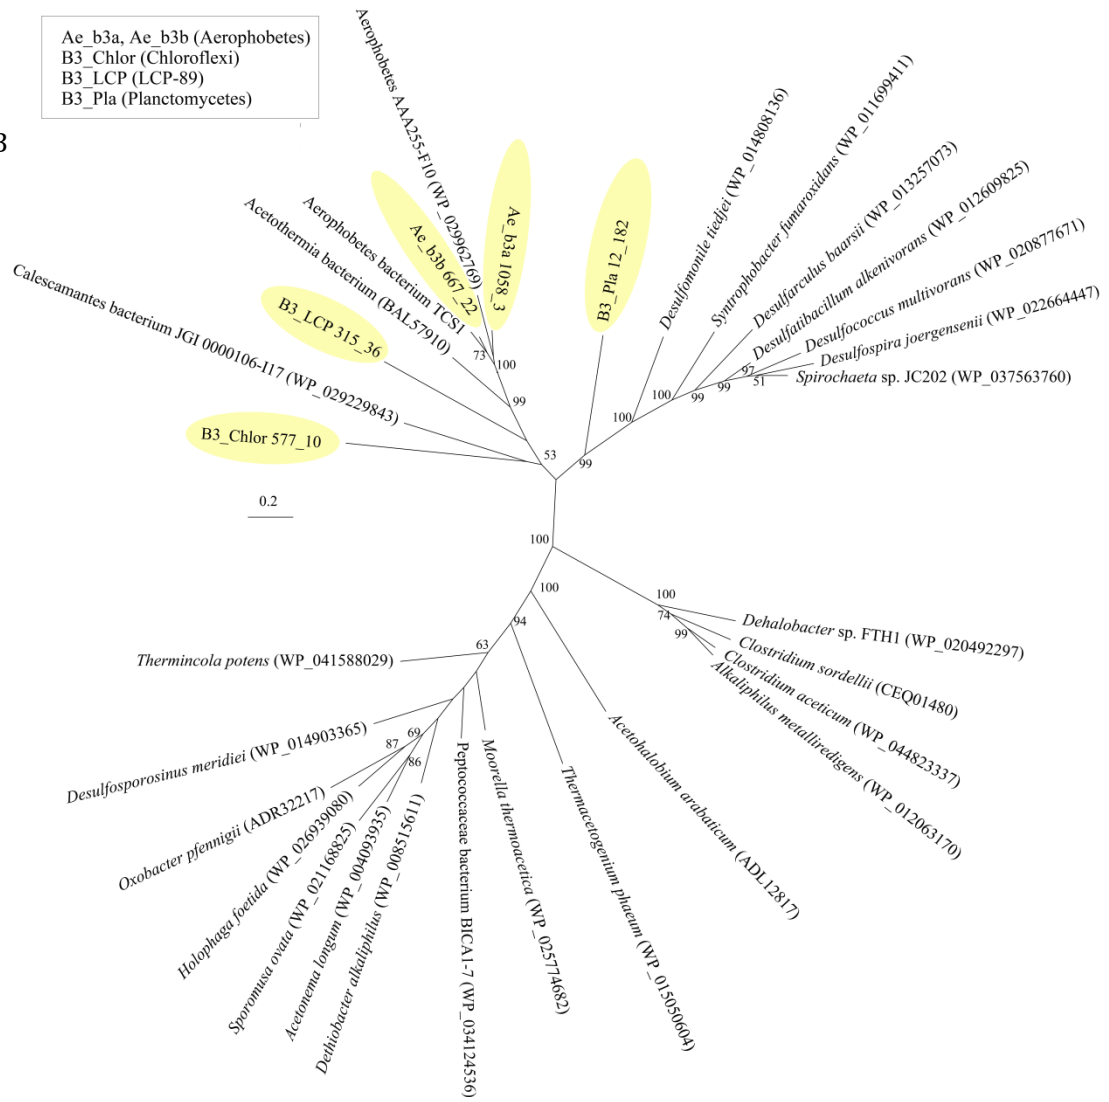

Figure S12. Organization of the genes involved in Wood-Ljungdahl (W-L) pathway. THF: tetrahydrofuran.

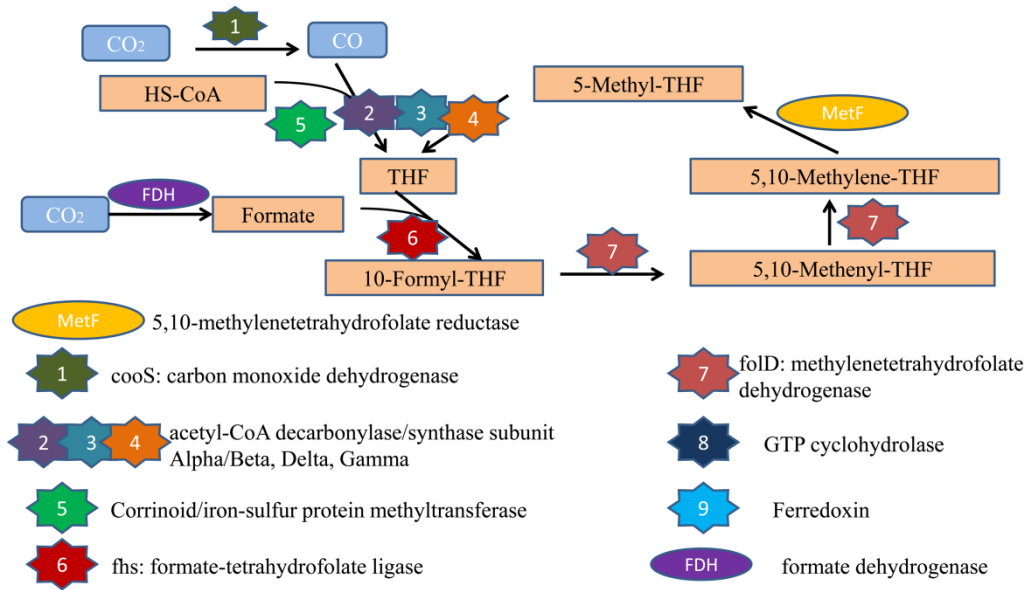

**Ae\_b3a(Aerophobetes):**

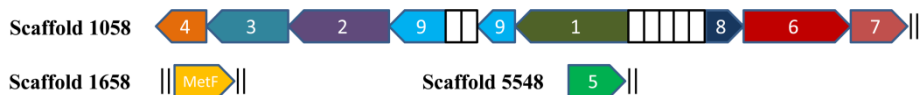

**Ae\_b3b (Aerophobetes) :**

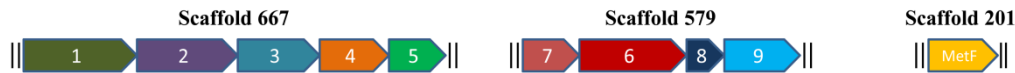

**B3\_Chlor (Chloroflexi) :**

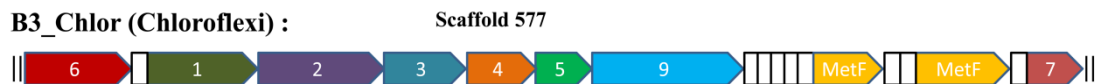

**B3\_LCP (LCP-89):**

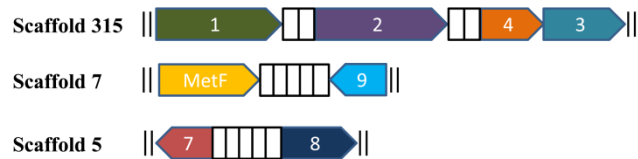

**B3\_Pla (Planctomycetes):**

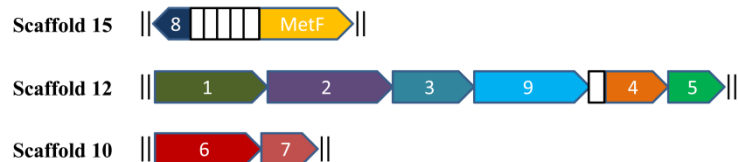

Figure S13. Read count for each MAGs of Metatranscriptome and Metagenome. (A) Percentage of transcripts assigned to B3 organisms in different layers. The transcriptome reads of clean Illumina data were aligned to CDSs of the B3 MAGs and were then summarized. (B) Percentage of metagenomic reads assigned to B3 MAGs in different layers.

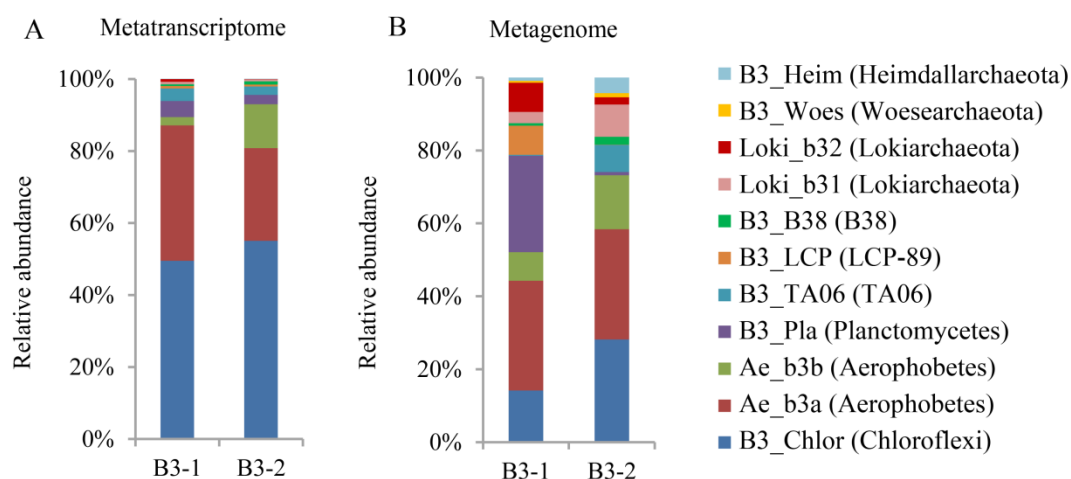

Figure S14. Genes of B3 MAGs expressed in metatranscriptome. Expression level of genes from MAGs reported in B3-1 and B3-2. The metatranscriptomic reads were selected for the 11 MAGs binned from the B3 metagenomes. The relative abundance of the genes was estimated by FPKM.

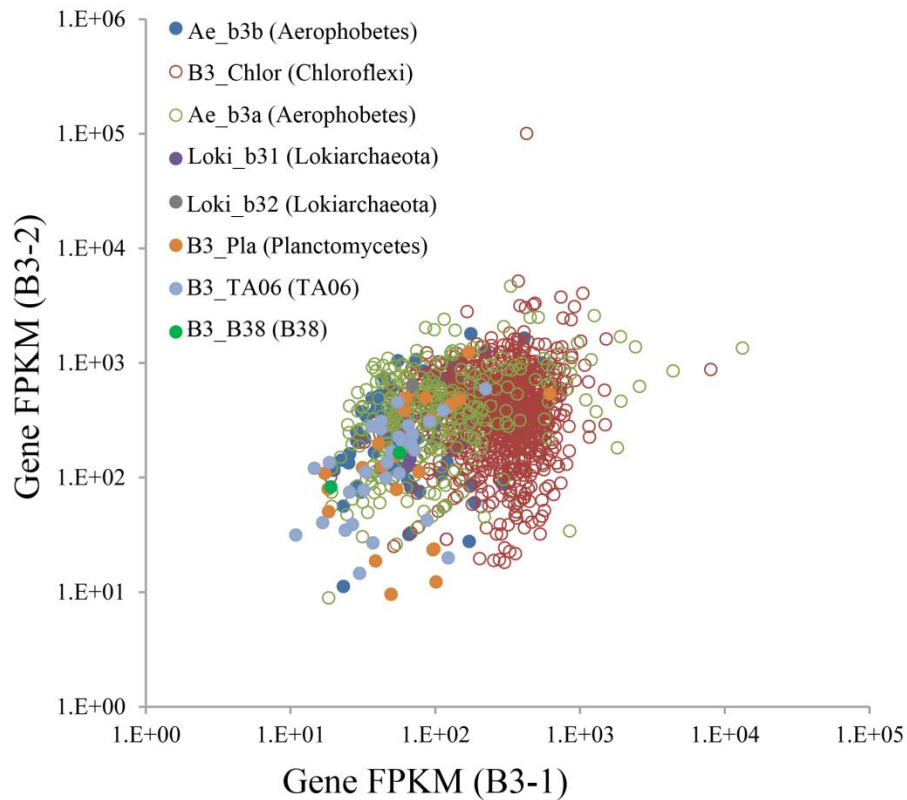

Table S1. Assembly statistics of B3 metagenomes.

|                            | B3-1          | B3-2 |
|----------------------------|---------------|------|
| Raw data (Gbp)             | 12            | 15   |
| Clean data (Gbp)           | 7.7           | 10.3 |
| Total raw data (Gbp)       | 27            |      |
| Total clean data (Gbp)     | 18            |      |
| Assembly size (bp)         | 1,819,740,546 |      |
| N50 (bp)                   | 837           |      |
| N90 (bp)                   | 448           |      |
| Max length (bp)            | 1,000,545     |      |
| Average length (bp)        | 836           |      |
| Total of scaffolds         | 2,175,262     |      |
| Number of scaffolds >1Kbp  | 335,330       |      |
| Number of scaffolds >5Kbp  | 21,484        |      |
| Number of scaffolds >10Kbp | 6,571         |      |

Table S2. List of 24 conserved proteins in B3 and reference genomes.

|                                                   | PF00164.22 | PF00177.18 | PF00189.17 | PF00203.18 | PF00237.16 | PF00238.16 | PF00252.15 | PF00281.16 | PF00297.19 | PF00298.16 | PF00318.17 | PF00333.17 | PF00347.20 | PF00366.17 | PF00380.16 | PF00410.16 | PF00411.16 | PF00416.19 | PF00466.17 | PF00572.15 | PF00573.19 | PF00687.18 | PF03719.12 | PF03946.11 |
|---------------------------------------------------|------------|------------|------------|------------|------------|------------|------------|------------|------------|------------|------------|------------|------------|------------|------------|------------|------------|------------|------------|------------|------------|------------|------------|------------|
| B3_Hades                                          | 1          | 1          | 1          | 1          | 1          | 1          | 1          | 1          | 1          | 1          | 1          | 1          | 1          | 1          | 1          | 1          | 1          | 1          | 1          | 1          | 1          | 1          | 1          | 1          |
| B3_Woes                                           | 1          | 1          | 1          | 1          | 1          | 1          | 1          | 1          | 1          | 1          | 1          | 1          | 1          | 1          | 1          | 1          | 1          | 1          | 1          | 1          | 1          | 1          | 1          | 1          |
| B3_Heim                                           | 1          | 1          | 1          | 1          | 1          | 1          | 1          | 1          | 1          | 1          | 1          | 1          | 1          | 1          | 1          | 1          | 1          | 1          | 1          | 1          | 1          | 1          | 1          | 1          |
| Loki_b31                                          | 1          | 1          | 1          | 1          | 1          | 1          | 1          | 1          | 1          | 1          | 1          | 1          | 1          | 1          | 1          | 1          | 1          | 1          | 1          | 1          | 1          | 1          | 1          | 1          |
| Loki_b32                                          | 1          | 1          | 1          | 1          | 1          | 1          | 1          | 1          | 0          | 1          | 1          | 1          | 1          | 1          | 1          | 1          | 0          | 0          | 1          | 1          | 1          | 1          | 1          | 1          |
| B3_Pla                                            | 1          | 1          | 1          | 1          | 1          | 1          | 1          | 1          | 1          | 1          | 1          | 1          | 1          | 1          | 1          | 1          | 0          | 1          | 1          | 1          | 1          | 1          | 1          | 1          |
| B3_Chlor                                          | 0          | 1          | 1          | 1          | 1          | 1          | 1          | 1          | 1          | 1          | 1          | 1          | 1          | 1          | 1          | 1          | 1          | 1          | 1          | 1          | 1          | 1          | 1          | 1          |
| Ae_b3a                                            | 1          | 1          | 1          | 1          | 1          | 1          | 1          | 1          | 1          | 1          | 1          | 1          | 1          | 1          | 1          | 1          | 1          | 1          | 1          | 1          | 1          | 1          | 1          | 1          |
| Ae_b3b                                            | 1          | 1          | 1          | 1          | 1          | 1          | 1          | 1          | 1          | 1          | 1          | 1          | 1          | 1          | 1          | 1          | 1          | 1          | 1          | 1          | 1          | 1          | 1          | 1          |
| B3_TA06                                           | 1          | 1          | 1          | 1          | 1          | 1          | 1          | 1          | 1          | 1          | 1          | 1          | 1          | 1          | 1          | 1          | 1          | 1          | 1          | 1          | 1          | 1          | 1          | 1          |
| B3_B38                                            | 1          | 1          | 1          | 1          | 1          | 1          | 1          | 1          | 1          | 1          | 1          | 1          | 1          | 1          | 1          | 1          | 1          | 1          | 1          | 1          | 1          | 1          | 1          | 1          |
| B3_LCP                                            | 1          | 1          | 1          | 1          | 1          | 1          | 2          | 1          | 1          | 1          | 1          | 1          | 1          | 1          | 1          | 1          | 1          | 1          | 1          | 1          | 1          | 1          | 1          | 1          |
| Nanoarchaeum_equitans_K<br>in4_M_uid58009         | 1          | 1          | 1          | 1          | 1          | 1          | 1          | 1          | 1          | 1          | 1          | 1          | 1          | 1          | 1          | 1          | 1          | 1          | 1          | 1          | 1          | 1          | 1          | 1          |
| Synergistetes_bacterium_S<br>GP1_uid197182        | 1          | 1          | 1          | 1          | 1          | 1          | 1          | 1          | 1          | 1          | 1          | 1          | 1          | 1          | 1          | 1          | 1          | 1          | 1          | 1          | 1          | 1          | 1          | 1          |
| Chlamydia_muridarum_Ni<br>gg_uid57785             | 1          | 1          | 1          | 1          | 1          | 1          | 1          | 1          | 1          | 1          | 1          | 1          | 1          | 1          | 1          | 1          | 1          | 1          | 1          | 1          | 1          | 1          | 1          | 1          |
| Ignicoccus_hospitalis_KIN<br>4_I_uid58365         | 1          | 1          | 1          | 1          | 1          | 1          | 1          | 1          | 1          | 1          | 1          | 1          | 1          | 1          | 1          | 1          | 1          | 1          | 1          | 1          | 1          | 1          | 1          | 1          |
| Prosthecochloris_aestuarii_<br>DSM_271_uid58151   | 1          | 1          | 1          | 1          | 1          | 1          | 1          | 1          | 1          | 1          | 1          | 1          | 1          | 1          | 1          | 1          | 1          | 1          | 1          | 1          | 1          | 1          | 1          | 1          |
| Acidimicrobium_ferroxida<br>ns_DSM_10331_uid59215 | 1          | 1          | 1          | 1          | 1          | 1          | 1          | 1          | 1          | 1          | 1          | 1          | 1          | 1          | 1          | 1          | 1          | 1          | 1          | 1          | 1          | 1          | 1          | 1          |
| Parachlamydia_acanthamoebae_<br>UV7_uid68335      | 1          | 1          | 1          | 1          | 1          | 1          | 1          | 1          | 1          | 1          | 1          | 1          | 1          | 1          | 1          | 1          | 1          | 1          | 1          | 1          | 1          | 1          | 1          | 1          |
| Elusimicrobium_minutum_<br>Pei191_uid58949        | 1          | 1          | 1          | 1          | 1          | 1          | 1          | 1          | 1          | 1          | 1          | 1          | 1          | 1          | 1          | 1          | 1          | 1          | 1          | 1          | 1          | 1          | 1          | 1          |
| Gloeobacter_JS_uid225602                          | 1          | 1          | 1          | 1          | 1          | 1          | 1          | 1          | 1          | 1          | 1          | 1          | 1          | 1          | 1          | 1          | 1          | 1          | 1          | 1          | 1          | 1          | 1          | 1          |
| TA06_bacterium_DG_24                              | 0          | 0          | 1          | 1          | 1          | 1          | 1          | 1          | 1          | 1          | 1          | 1          | 1          | 1          | 1          | 1          | 1          | 1          | 1          | 1          | 1          | 1          | 1          | 1          |
| Hyd24-12_bacterium_Ran_1                          | 1          | 1          | 1          | 1          | 1          | 1          | 1          | 1          | 1          | 1          | 1          | 1          | 1          | 1          | 1          | 1          | 1          | 1          | 1          | 1          | 1          | 1          | 1          | 1          |
| Bacteroides_CF50_uid222805                        | 1          | 1          | 1          | 1          | 1          | 1          | 1          | 1          | 1          | 1          | 1          | 1          | 1          | 1          | 1          | 1          | 1          | 1          | 1          | 1          | 1          | 1          | 1          | 1          |
| Acholeplasma_laidlawii_P<br>G_8A_uid58901         | 1          | 1          | 1          | 1          | 1          | 1          | 1          | 1          | 1          | 1          | 1          | 1          | 1          | 1          | 1          | 1          | 1          | 1          | 1          | 1          | 1          | 1          | 1          | 1          |
| Rhodothermus_marinus_DSM_4252_<br>uid41729        | 1          | 1          | 1          | 1          | 1          | 1          | 1          | 1          | 1          | 1          | 1          | 1          | 1          | 1          | 1          | 1          | 1          | 1          | 1          | 1          | 1          | 1          | 1          | 1          |
| Nostoc_PCC_7107_uid182932                         | 1          | 1          | 1          | 1          | 1          | 1          | 1          | 1          | 1          | 1          | 1          | 1          | 1          | 1          | 1          | 1          | 1          | 1          | 1          | 1          | 1          | 1          | 1          | 1          |
| Gemmatimonas_aurantiaca_T_27_<br>uid58813         | 1          | 1          | 1          | 1          | 1          | 1          | 1          | 1          | 1          | 1          | 1          | 1          | 1          | 1          | 1          | 1          | 1          | 1          | 1          | 1          | 1          | 1          | 1          | 1          |
| Persephonella_marina_EX_HI_<br>uid58119           | 1          | 1          | 1          | 1          | 1          | 1          | 1          | 1          | 1          | 1          | 1          | 1          | 1          | 1          | 1          | 1          | 1          | 1          | 1          | 1          | 1          | 1          | 1          | 1          |
| Chloroflexus_aggregans_DSM_9485_<br>uid58621      | 1          | 1          | 1          | 1          | 1          | 1          | 1          | 1          | 1          | 1          | 1          | 1          | 1          | 1          | 1          | 1          | 1          | 1          | 1          | 1          | 1          | 1          | 1          | 1          |
| Brachyspira_hydrosentaria_e_WA1_<br>uid59291      | 1          | 1          | 1          | 1          | 1          | 1          | 1          | 1          | 1          | 1          | 1          | 1          | 1          | 1          | 1          | 1          | 1          | 1          | 1          | 1          | 1          | 1          | 1          | 1          |
| Eubacterium_eligens_ATC_C_27750_<br>uid59171      | 1          | 1          | 1          | 1          | 1          | 1          | 1          | 1          | 1          | 1          | 1          | 1          | 1          | 1          | 1          | 1          | 1          | 1          | 1          | 1          | 1          | 1          | 1          | 1          |
| Chlorobium_luteolum_DS_M_273_<br>uid58175         | 1          | 1          | 1          | 1          | 1          | 1          | 1          | 1          | 1          | 1          | 1          | 1          | 1          | 1          | 1          | 1          | 1          | 1          | 1          | 1          | 1          | 1          | 1          | 1          |
| Phycisphaera_mikurensis_NBRC_102666_<br>uid157331 | 1          | 1          | 1          | 1          | 1          | 1          | 1          | 1          | 1          | 1          | 1          | 1          | 1          | 1          | 1          | 1          | 1          | 1          | 1          | 1          | 1          | 1          | 1          | 1          |
| Mobiluncus_curtisii_ATCC_43063_<br>uid49695       | 1          | 1          | 1          | 1          | 1          | 1          | 1          | 1          | 1          | 1          | 1          | 1          | 1          | 1          | 1          | 1          | 1          | 1          | 1          | 1          | 1          | 1          | 1          | 1          |
| Nanoarchaeote_NstI_NstI                           | 1          | 1          | 1          | 1          | 1          | 1          | 1          | 1          | 1          | 1          | 1          | 1          | 1          | 1          | 1          | 0          | 1          | 1          | 1          | 1          | 1          | 1          | 1          | 1          |
| Heimdallarchaeota LC_2                            | 1          | 0          | 1          | 1          | 1          | 1          | 0          | 1          | 0          | 1          | 1          | 1          | 1          | 1          | 1          | 1          | 1          | 1          | 1          | 1          | 0          | 1          | 1          | 1          |
| Streptobacillus_moniliformis_DSM_12112            | 1          | 1          | 1          | 1          | 1          | 1          | 1          | 1          | 1          | 1          | 1          | 1          | 1          | 1          | 1          | 1          | 1          | 1          | 1          | 1          | 1          | 1          | 1          | 1          |
| Hyd24-12_bacterium_Vib_1                          | 1          | 1          | 1          | 1          | 1          | 1          | 1          | 1          | 1          | 1          | 1          | 1          | 1          | 1          | 1          | 1          | 1          | 1          | 1          | 1          | 1          | 1          | 1          | 1          |
| Acidobacterium_MP5ACT_X9_uid50551                 | 1          | 1          | 1          | 1          | 1          | 1          | 1          | 1          | 1          | 1          | 1          | 1          | 1          | 1          | 1          | 1          | 1          | 1          | 1          | 1          | 1          | 1          | 1          | 1          |
| Aquifex_aeolicus_VF5_uid57765                     | 2          | 2          | 1          | 1          | 1          | 1          | 1          | 1          | 1          | 1          | 1          | 1          | 1          | 1          | 1          | 1          | 1          | 1          | 1          | 1          | 1          | 1          | 1          | 1          |
| Acaryochloris_marina_MB                           | 1          | 1          | 1          | 1          | 1          | 1          | 1          | 1          | 1          | 1          | 1          | 1          | 1          | 1          | 1          | 1          | 1          | 1          | 1          | 1          | 1          | 1          | 1          | 1          |









|             |         |       |      |      |                                                        |
|-------------|---------|-------|------|------|--------------------------------------------------------|
| Ae_b3a      | 1728_3  | CE11  | 4.20 | 0.54 | UDP-3-O-3-hydroxymyristoy                              |
| Ae_b3a      | 2584_10 | CE10  | 4.08 | 0.55 | peptidase S9                                           |
| Ae_b3a      | 248_44  | CE10  | 3.92 | 0.25 | alpha/beta fold family hydrolase                       |
| Ae_b3a      | 2748_2  | GH109 | 3.37 | 0.64 | putative oxidoreductase                                |
| Ae_b3a      | 173_21  | GH116 | 3.26 | 1.41 | MULTISPECIES: hypothetical protein                     |
| Ae_b3a      | 11675_1 | GH109 | 3.17 | 0.94 | oxidoreductase                                         |
| Ae_b3a      | 14454_1 | CE9   | 2.34 | 0.27 | N-acetylglucosamine-6-phosphate deacetylase            |
| Ae_b3a      | 670_24  | GT19  | 2.13 | 1.14 | lipid-A-disaccharide synthase                          |
| Ae_b3a      | 782_32  | GH127 | 2.01 | 0.23 | arabinosidase                                          |
| Ae_b3a      | 172_15  | GT4   | 1.99 | 1.10 | glycosyl transferase family 1                          |
| Ae_b3a      | 3453_10 | GH94  | 1.89 | 3.73 | N,N'-diacetylchitobiose phosphorylase                  |
| Ae_b3a      | 4566_4  | GT2   | 1.85 | 0.51 | glycosyl transferase                                   |
| Ae_b3a      | 1428_9  | GH120 | 1.63 | 1.16 | parallel beta-helix repeat-containing protein, partial |
| Ae_b3a      | 297_13  | GH109 | 1.62 | 3.38 | oxidoreductase NAD-binding domain protein              |
| Ae_b3a      | 172_13  | GH130 | 0.69 | 0.42 | glycosidase                                            |
| Ae_b3a      | 5871_11 | GH130 | 0.58 | 0.66 | glycosidase                                            |
| Chloroflexi |         |       |      |      |                                                        |
| B3_Chlor    | 504_4   | GT83  | 2.29 | 0.71 | conserved membrane protein of unknown function         |
| B3_Chlor    | 92_28   | GT83  | 1.95 | 0.63 | glycosyl transferase family 39                         |
| B3_Chlor    | 150_56  | GT4   | 1.26 | 5.31 | putative glycosyltransferase                           |
| B3_Chlor    | 150_61  | GT87  | 0.91 | 0.26 | membrane protein                                       |
| B3_Chlor    | 607_26  | GT2   | 0.85 | 0.23 | Glycosyltransferase                                    |
| B3_Chlor    | 92_15   | GT76  | 0.78 | 0.34 | conserved hypothetical protein                         |
| B3_Chlor    | 100_57  | CE1   | 0.75 | 0.18 | 3-oxoadipate enol-lactonase                            |
| B3_Chlor    | 143_67  | GT2   | 0.67 | 0.17 | glycosyl transferase                                   |
| B3_Chlor    | 82_13   | GT2   | 0.64 | 0.22 | glycosyl transferase                                   |
| B3_Chlor    | 100_78  | GT83  | 0.60 | 0.82 | membrane protein of unknown function                   |
| B3_Chlor    | 4446_12 | GH65  | 0.60 | 0.63 | Kojibiose phosphorylase                                |
| B3_Chlor    | 150_57  | GT4   | 0.53 | 0.30 | glycosyl transferase                                   |
| B3_Chlor    | 63_23   | CBM50 | 0.47 | 0.83 | peptidoglycan-binding protein                          |
| B3_Chlor    | 2532_1  | GT83  | 0.45 | 0.32 | MULTISPECIES: glycosyl transferase family 39           |
| B3_Chlor    | 308_39  | GT4   | 0.45 | 0.12 | MULTISPECIES: glycosyl transferase family 1            |
| B3_Chlor    | 92_16   | GT66  | 0.42 | 0.73 | hypothetical conserved protein                         |
| B3_Chlor    | 92_10   | GT87  | 0.42 | 0.33 | hypothetical protein                                   |
| B3_Chlor    | 6378_9  | GT4   | 0.41 | 0.27 | group 1 glycosyl transferase                           |
| B3_Chlor    | 143_63  | GH3   | 0.39 | 0.30 | glycosidase                                            |
| B3_Chlor    | 4446_3  | CE10  | 0.39 | 0.35 | temperature sensitive supressor                        |
| B3_Chlor    | 150_64  | GT83  | 0.39 | 0.28 | hypothetical protein AMJ56_08725                       |
| B3_Chlor    | 63_26   | CBM50 | 0.39 | 0.52 | glycosyl hydrolase                                     |
| B3_Chlor    | 92_32   | GT83  | 0.35 | 0.22 | Uncharacterized membrane protein                       |
| B3_Chlor    | 100_69  | GT51  | 0.34 | 1.02 | penicillin-binding protein 1C                          |
| B3_Chlor    | 150_62  | GT83  | 0.33 | 0.39 | glycosyl transferase family 39                         |
| B3_Chlor    | 220_10  | CBM50 | 0.33 | 0.79 | hypothetical protein Haur_2980                         |
| B3_Chlor    | 69_89   | GT83  | 0.29 | 0.28 | tetratricopeptide-repeat containing protein            |
| B3_Chlor    | 150_66  | GT39  | 0.29 | 0.16 | hypothetical protein AMJ50_02015                       |

|          |         |       |      |      |                                                                       |
|----------|---------|-------|------|------|-----------------------------------------------------------------------|
| B3_Chlor | 100_54  | CBM50 | 0.28 | 0.53 | ErfK/YbiS/YcfS/YnhG family protein                                    |
| B3_Chlor | 485_15  | GT4   | 0.28 | 0.23 | MULTISPECIES: glycosyl transferase family 1                           |
| B3_Chlor | 6378_1  | GT83  | 0.28 | 5.01 | Membrane protein-like protein                                         |
| B3_Chlor | 100_33  | CE7   | 0.26 | 0.93 | alpha/beta superfamily hydrolase                                      |
| B3_Chlor | 150_43  | GH39  | 0.26 | 0.36 | conserved hypothetical protein                                        |
| B3_Chlor | 360_43  | GT39  | 0.26 | 0.88 | NHL repeat containing protein                                         |
| B3_Chlor | 1486_20 | GH23  | 0.25 | 0.53 | lytic transglycosylase                                                |
| B3_Chlor | 100_14  | CBM50 | 0.24 | 0.50 | putative glycosyltransferase                                          |
| B3_Chlor | 308_40  | GT4   | 0.24 | 0.23 | glycosyl transferase family 1                                         |
| B3_Chlor | 63_25   | CBM50 | 0.24 | 0.51 | conserved exported protein of unknown function                        |
| B3_Chlor | 150_63  | GT83  | 0.24 | 1.02 | Glycosyl transferase family 39                                        |
| B3_Chlor | 2278_9  | GT2   | 0.23 | 0.45 | succinoglycan biosynthesis protein exoa                               |
| B3_Chlor | 2278_10 | GT4   | 0.23 | 0.35 | glycosyl transferase family 1                                         |
| B3_Chlor | 358_13  | GH5   | 0.23 | 5.20 | glycoside hydrolase                                                   |
| B3_Chlor | 504_27  | GH39  | 0.23 | 1.20 | conserved protein of unknown function                                 |
| B3_Chlor | 864_18  | GT83  | 0.23 | 0.80 | hypothetical protein CLDAP_21560                                      |
| B3_Chlor | 948_13  | CBM61 | 0.23 | 0.16 | LysM domain-containing protein                                        |
| B3_Chlor | 864_36  | GT83  | 0.23 | 0.52 | PA14 domain protein                                                   |
| B3_Chlor | 626_3   | GT4   | 0.23 | 0.27 | group 1 glycosyl transferase                                          |
| B3_Chlor | 340_37  | GT51  | 0.23 | 0.86 | penicillin-binding protein 1C                                         |
| B3_Chlor | 174_2   | GT2   | 0.22 | 0.20 | putative glycosyltransferase                                          |
| B3_Chlor | 308_44  | GH2   | 0.22 | 3.37 | beta-mannosidase                                                      |
| B3_Chlor | 100_64  | GT83  | 0.22 | 0.29 | membrane protein of unknown function                                  |
| B3_Chlor | 150_67  | GT39  | 0.22 | 1.41 | glycosyl transferase family 39                                        |
| B3_Chlor | 143_41  | GT39  | 0.21 | 2.99 | membrane hypothetical protein                                         |
| B3_Chlor | 378_29  | GH15  | 0.21 | 0.26 | glycoside hydrolase family 15                                         |
| B3_Chlor | 2497_6  | GT83  | 0.21 | 1.16 | glycosyl transferase family 39                                        |
| B3_Chlor | 150_55  | GT9   | 0.20 | 0.34 | glycosyl transferase family 9                                         |
| B3_Chlor | 150_65  | GT39  | 0.19 | 0.81 | hypothetical protein AMJ56_08725                                      |
| B3_Chlor | 876_6   | GT83  | 0.19 | 1.71 | membrane protein-like protein                                         |
| B3_Chlor | 864_4   | CBM50 | 0.19 | 0.22 | putative peptidase                                                    |
| B3_Chlor | 6132_6  | GH74  | 0.18 | 0.38 | hypothetical protein                                                  |
| B3_Chlor | 785_29  | GH3   | 0.18 | 0.41 | beta-N-acetylhexosaminidase                                           |
| B3_Chlor | 150_44  | GH18  | 0.16 | 1.13 | exported protein of unknown function                                  |
| B3_Chlor | 580_5   | CE10  | 0.16 | 0.30 | peptidase, S9A/B/C family, catalytic domain protein                   |
| B3_Chlor | 1378_8  | CE1   | 0.16 | 0.12 | alpha/beta hydrolase                                                  |
| B3_Chlor | 92_3    | CBM57 | 0.16 | 0.26 | peptidase                                                             |
| B3_Chlor | 220_30  | GT83  | 0.16 | 0.51 | dolichyl-phosphate-mannose-protein mannosyltransferase/<br>NHL repeat |
| B3_Chlor | 220_11  | CBM66 | 0.16 | 0.40 | hypothetical protein AMJ85_00100                                      |
| B3_Chlor | 308_25  | GH109 | 0.15 | 0.16 | oxidoreductase domain protein                                         |
| B3_Chlor | 226_60  | GT2   | 0.15 | 0.40 | glucosaminyltransferase                                               |
| B3_Chlor | 308_41  | GT4   | 0.14 | 0.59 | glycosyl transferase group 1                                          |
| B3_Chlor | 487_35  | GT39  | 0.13 | 0.34 | putative membrane protein                                             |
| B3_Chlor | 220_31  | GT83  | 0.13 | 1.24 | MULTISPECIES: TIGR03663 family protein                                |

|          |        |       |      |      |                                                                                                                     |
|----------|--------|-------|------|------|---------------------------------------------------------------------------------------------------------------------|
| B3_Chlor | 536_17 | AA6   | 0.12 | 0.06 | nitric oxide synthase                                                                                               |
| B3_Chlor | 876_5  | GH39  | 0.12 | 0.80 | conserved protein of unknown function                                                                               |
| B3_Chlor | 485_14 | PL22  | 0.12 | 0.49 | exported protein of unknown function                                                                                |
| B3_Chlor | 378_25 | CBM32 | 0.10 | 0.16 | coagulation factor 5/8 type domain-containing protein                                                               |
| B3_Chlor | 876_13 | CE4   | 0.10 | 0.20 | polysaccharide deacetylase, partial                                                                                 |
| B3_Chlor | 150_2  | AA4   | 0.09 | 1.26 | FAD-binding protein                                                                                                 |
| B3_Chlor | 92_54  | GT28  | 0.08 | 0.30 | UDP-N-acetylglucosamine--N-acetylmuramyl-(pentapeptide) pyrophosphoryl-undecaprenol N-acetylglucosamine transferase |

\*indicates (RNA FPKM)/ (DNA FPKM) in each layer.

Table S6. Microorganisms and 16S rRNA gene sequence accession numbers used for phylogenetic analysis

| Accession number | Taxonomic group | Organism/clone name                                     |
|------------------|-----------------|---------------------------------------------------------|
| JQ278807         | Acetothermia    | Uncultured bacterium clone fjc-63                       |
| FJ901734         | Acetothermia    | Uncultured Acetothermia bacterium clone LP5013          |
| HE603999         | Acetothermia    | Uncultured bacterium clone Central-Bottom-cDNA_clone159 |
| AY234418         | Acidobacteria   | Bacterium Ellin5001                                     |
| AY234751         | Acidobacteria   | Bacterium Ellin6099                                     |
| AY234723         | Acidobacteria   | Bacterium Ellin6071                                     |
| AY234628         | Actinobacteria  | Bacterium Ellin5277                                     |
| U30661           | Actinobacteria  | <i>Mycobacterium</i> sp. RJG11.135                      |
| AY234429         | Actinobacteria  | Bacterium Ellin5012                                     |
| AB050206         | Aenigmarchaeota | uncultured archaeon SAGMA-B                             |
| AB237753         | Aenigmarchaeota | uncultured archaeon                                     |
| AJ347789         | Aenigmarchaeota | uncultured SA2 group euryarchaeote                      |
| DQ103684         | Aenigmarchaeota | uncultured euryarchaeote                                |
| DQ133424         | Aenigmarchaeota | uncultured Methanobacteriaceae archaeon                 |
| AB177139         | Aerophobetes    | Uncultured bacterium clone ODP1230B10.20                |
| FJ873295         | Aerophobetes    | Uncultured bacterium clone boHTK-31                     |
| JSVS00000000     | Aerophobetes    | Aerophobetes bacterium TCS1                             |
| ASMN01000059     | Aerophobetes    | Aerophobetes bacterium SCGC AAA255-F10                  |
| ASMM01000001     | Aerophobetes    | Aerophobetes bacterium JGI 0000014-A15                  |
| FJ813562         | Aminicenantes   | Uncultured bacterium clone GoC_Bac_71_D0_C0_M1          |
| AB177172         | Aminicenantes   | Uncultured bacterium clone ODP1230B20.28                |
| AB177161         | Aminicenantes   | Uncultured bacterium clone ODP1230B18.23                |
| AB015269         | Atribacteria    | uncultured Candidatus Atribacteria bacterium            |
| AB189340         | Atribacteria    | Uncultured bacterium clone JT58-14                      |
| FJ873257         | Atribacteria    | Uncultured bacterium clone boHTK-28                     |
| JQ818135.1       | B38             | Uncultured bacterium clone MD-178-10-3261_T2-P_S2400    |
| JX000635.1       | B38             | Uncultured bacterium clone ORI-934-08-P_S258-260_086B06 |
| JN230300.1       | B38             | Uncultured bacterium clone 3H3M_69                      |
| AB177169.1       | B38             | Uncultured bacterium clone ODP1230B20.01                |
| EU823302         | Bacteroidetes   | <i>Leeuwenhoekiella marinoflava</i> strain P7           |
| L11703           | Bacteroidetes   | <i>Thermonema lapsum</i>                                |
| NR_042496        | Bacteroidetes   | <i>Flavobacterium johnsoniae</i> strain UW101           |
| U05662           | Calescamantes   | Eubacteria EM 19                                        |

|                |                          |                                                 |
|----------------|--------------------------|-------------------------------------------------|
| AF352537       | Calescamantes            | Uncultured bacterium clone BH81                 |
| AQST01000031   | Calescamantes            | Calescamantes bacterium SCGC AAA471-M6          |
| CZVW01000013.1 | Candidatus<br>Kryptonina | Kryptonina bacterium JGI 23                     |
| LDXU01000006.1 | Candidatus<br>Kryptonina | <i>Thermokryptus mobilis</i>                    |
| X86447         | Chloroflexi              | <i>Herpetosiphon</i> sp.                        |
| AY395567       | Chloroflexi              | <i>Candidatus</i> Chlorothrix                   |
| FJ790638       | Chloroflexi              | Kallotenuales;AKIW781                           |
| FJ793156       | Chloroflexi              | Anaerolineaceae;uncultured                      |
| AB237730       | Cloacimonetes            | Uncultured bacterium clone HDBW-WB67            |
| AB513440       | Cloacimonetes            | Uncultured bacterium clone TUT1989-U1           |
| KJ881295       | Cloacimonetes            | Uncultured bacterium clone EGSB_20_2-21         |
| AB009616       | Crenarchaeota            | <i>Thermoproteus</i> sp. IC-033                 |
| AB010957       | Crenarchaeota            | <i>Sulfolobus yangmingensis</i>                 |
| AB087499       | Crenarchaeota            | <i>Caldisphaera lagunensis</i>                  |
| AB109559       | Crenarchaeota            | <i>Aeropyrum camini</i>                         |
| DQ228594       | Crenarchaeota            | Uncultured archaeon                             |
| U40332         | Cyanobacteria            | <i>Microcystis viridis</i> NIES-102             |
| EF174209       | Cyanobacteria            | Nostoc sp. 'Pannaria pallida cyanobiont' 2 Ch   |
| AP011615       | Cyanobacteria            | <i>Arthrospira platensis</i> NIES-39            |
| AB019734       | Diapherotrites           | Unidentified archaeon                           |
| AB019748       | Diapherotrites           | Unidentified archaeon                           |
| AB237755       | Diapherotrites           | Uncultured archaeon                             |
| AJ937874       | Diapherotrites           | Uncultured archaeon                             |
| NR_074876      | Dictyoglomi              | <i>Dictyoglomus thermophilum</i> strain H-6-12  |
| CP001251       | Dictyoglomi              | <i>Dictyoglomus turgidum</i> DSM 6724           |
| X69194         | Dictyoglomi              | <i>Dictyoglomus thermophilum</i> H-6-12         |
| AB004575       | Elusimicrobia            | Uncultured bacterium clone TG13                 |
| AB034017       | Elusimicrobia            | Uncultured rumen bacterium 4C0d-3               |
| JQ278784       | Elusimicrobia            | Uncultured bacterium clone fjc-39               |
| AACY023249168  | Euryarchaeota            | Marine Group II;marine metagenome               |
| AB004878       | Euryarchaeota            | <i>Haloterrigena turkmenica</i>                 |
| AB008853       | Euryarchaeota            | <i>Methanocalculus pumilus</i>                  |
| AB019758       | Euryarchaeota            | ANME-1a                                         |
| AB019735       | Euryarchaeota            | Unidentified archaeon                           |
| AB034189       | Euryarchaeota            | Uncultured rumen methanogen                     |
| AB196288       | Euryarchaeota            | <i>Methanocella paludicola</i> SANAE            |
| AB237756       | Euryarchaeota            | Uncultured archaeon                             |
| AJ347780       | Euryarchaeota            | Uncultured SA1 group euryarchaeote              |
| AY234571       | Gemmatimonadetes         | Bacterium Ellin5220                             |
| AB015578       | Gemmatimonadetes         | Uncultured bacterium clone BD7-2                |
| JQ311868       | Gemmatimonadetes         | Uncultured bacterium clone OTU80-64             |
| JQ278764       | Gracilibacteria          | Uncultured bacterium clone fjc-16               |
| JQ278776       | Gracilibacteria          | Uncultured bacterium clone fjc-31               |
| JQ287266       | Gracilibacteria          | Uncultured bacterium clone 3M33_057             |
| MDVS01000000   | Heimdallarchaeota        | Heimdallarchaeota LC_3                          |
| FN553950       | Hyd24-12                 | Uncultured sediment bacterium clone 257-34      |
| EF515519       | Hyd24-12                 | Uncultured bacterium clone 29e09                |
| EF515727       | Hyd24-12                 | Uncultured bacterium clone 32g09                |
| FJ813576       | Latescibacteria          | Uncultured bacterium clone GoC_Bac_161_D0_C0_M1 |
| FJ813575       | Latescibacteria          | Uncultured bacterium clone GoC_Bac_163_D2_C0_M0 |

|              |                  |                                                            |
|--------------|------------------|------------------------------------------------------------|
| AB240493     | Latescibacteria  | Uncultured bacterium clone SRRT67                          |
| AB177213     | LCP-89           | Uncultured bacterium clone ODP1230B34.16                   |
| KC470941     | LCP-89           | Uncultured bacterium clone N_228                           |
| HF922356     | LCP-89           | Uncultured bacterium clone HP-Bac-F07                      |
| JYIM01000000 | Lokiarchaeota    | <i>Lokiarchaeum</i> GC14_75                                |
| DQ329861     | OP11             | Uncultured candidate division OP11 bacterium               |
| HM856437     | OP11             | Uncultured candidate division OP11 bacterium               |
| JN003058     | OP11             | Uncultured candidate division OP11 bacterium               |
| AB015551     | OP3              | Uncultured bacterium clone BD3-9                           |
| JQ278816     | OP3              | Uncultured bacterium clone fjc-73                          |
| JQ278884     | OP3              | Uncultured bacterium clone hmx-282                         |
| JQ278939     | Parcubacteria    | Uncultured bacterium clone sf-17                           |
| JQ287076     | Parcubacteria    | Uncultured bacterium clone 3M23_041                        |
| JQ287225     | Parcubacteria    | Uncultured bacterium clone 3M33_009                        |
| FJ718986     | Parvarchaeota    | Uncultured archaeon                                        |
| FJ810533     | Parvarchaeota    | Uncultured archaeon                                        |
| FJ810536     | Parvarchaeota    | Uncultured archaeon                                        |
| FJ810539     | Parvarchaeota    | Uncultured archaeon                                        |
| FJ810527     | Parvarchaeota    | Uncultured archaeon                                        |
| AY234714     | Planctomycetes   | Bacterium Ellin6062                                        |
| AB015544     | Planctomycetes   | Uncultured bacterium clone BD2-16                          |
| AB015552     | Planctomycetes   | Uncultured bacterium clone BD3-11                          |
| JQ278972     | Saccharibacteria | Uncultured candidate division TM7 bacterium clone sf-78    |
| AB100499     | Saccharibacteria | Uncultured candidate division TM7 bacterium clone Rs-045   |
| FJ825446     | Saccharibacteria | Uncultured bacterium clone 110_BE2_40                      |
| AB558582     | Synergistetes    | <i>Lactivibrio alcoholicus</i>                             |
| NR_043522    | Synergistetes    | <i>Thermovirga lienii</i> strain Cas60314                  |
| CM001377     | Synergistetes    | <i>Thermanaerovibrio velox</i> DSM 12556                   |
| FJ821659     | TA06             | Uncultured bacterium clone R15                             |
| AB186797     | TA06             | Uncultured bacterium clone TSBZ04                          |
| LJNI00000000 | TA06             | TA06_bacterium_DG_78                                       |
| AY231458     | Tenericutes      | <i>Mesoplasma syrphidae</i>                                |
| U44771       | Tenericutes      | <i>Mycoplasma ovipneumoniae</i> ATCC 29419                 |
| AY257485     | Tenericutes      | <i>Acholeplasma pleciae</i>                                |
| AB050221     | Thaumarchaeota   | Soil Crenarchaeotic Group(SCG);uncultured archaeon SAGMA-P |
| AB050207     | Thaumarchaeota   | Marine Group I; uncultured archaeon SAGMA-C                |
| AB050240     | Thaumarchaeota   | Uncultured archaeon SAGMA-10                               |
| AB050231     | Thaumarchaeota   | Uncultured archaeon SAGMA-Z                                |
| AF119127     | Thaumarchaeota   | Marine Group I;uncultured archaeon CRA8-11cm               |
| AF227642     | Thaumarchaeota   | Uncultured crenarchaeote TRC23-30                          |
| KF954236     | Thaumarchaeota   | Marine Benthic Group A;uncultured thaumarchaeote           |
| KJ810535     | Thaumarchaeota   | <i>Candidatus Nitrososphaera</i> sp. THUAOA                |
| NR_102773    | Thermotogae      | <i>Thermosipho africanus</i> TCF52B strain TCF52B          |
| NR_029163    | Thermotogae      | <i>Thermotoga maritima</i> strain MSB-8                    |
| NR_042373    | Thermotogae      | <i>Thermotoga naphthophila</i> strain RKU-10               |
| NR_074833    | Thermotogae      | <i>Thermotoga thermarum</i> strain DSM 5069                |
| NR_074951    | Thermotogae      | <i>Thermotoga lettingae</i> strain TMO                     |
| NR_074959    | Thermotogae      | <i>Thermotoga neapolitana</i> strain DSM 4359              |
| LRSK01000239 | Thorarchaeota    | <i>Candidatus</i> Thorarchaeota archaeon SMTZ1-83          |
| FJ351268     | Thorarchaeota    | Uncultured archaeon clone 060329_T2S2_S_T_SDP_038          |



|               |                 |                                                |
|---------------|-----------------|------------------------------------------------|
| FJ353523      | Thorarchaeota   | Uncultured archaeon clone Gctb_ML_097          |
| AY234519      | Verrucomicrobia | Bacterium Ellin5102                            |
| U60014        | Verrucomicrobia | <i>Prostheco bacter debontii</i>               |
| EF157839      | Verrucomicrobia | <i>Lentimonas marisflavi</i>                   |
| CP010425.1    | Woese archaeota | Archaeon GW2011_AR15                           |
| AACY020521239 | Woese archaeota | Woese archaeota(DHVEG-6);marine metagenome     |
| AACY023847387 | Woese archaeota | Woese archaeota(DHVEG-6);marine metagenome     |
| AB019750      | Woese archaeota | Woese archaeota(DHVEG-6);unidentified archaeon |
| AB019749      | Woese archaeota | Woese archaeota(DHVEG-6);unidentified archaeon |
| AB019751      | Woese archaeota | Woese archaeota(DHVEG-6);unidentified archaeon |
| FJ792219      | WS6             | Uncultured bacterium clone SGYF454             |
| AB243816      | WS6             | Uncultured bacterium clone Niigata-05          |
| KC290428      | WS6             | Uncultured bacterium clone NY-28               |
